# Supplementary material
Source: HighWire-hosted journal article supplement (https://bmjopen.bmj.com/content/12/5/e058793)
Supplement: inline-supplementary-material-1 [file inline-supplementary-material-1.pdf]

Supplemental table 1. The prevalence of hyperuricemia\* and association of GGT level and hyperuricemia in the participants.

| GGT            | Prevalence  |                | OR (95% CI)        | P       | P for trend |
|----------------|-------------|----------------|--------------------|---------|-------------|
| <b>Model 1</b> |             |                |                    |         | <0.0001     |
| Q1             | 412 (10.6)  | $X^2 = 2295.7$ | Reference          |         |             |
| Q2             | 934 (19.8)  | $P < 0.0001$   | 2.09 (1.84, 2.36)  | <0.0001 |             |
| Q3             | 1386 (31.0) |                | 3.78 (3.36, 4.27)  | <0.0001 |             |
| Q4             | 1839 (41.1) |                | 5.89 (5.23, 6.63)  | <0.0001 |             |
| Q5             | 2403 (53.8) |                | 9.81 (8.72, 11.04) | <0.0001 |             |
| <b>Model 2</b> |             |                |                    |         | <0.0001     |
| Q1             |             |                | Reference          |         |             |
| Q2             |             |                | 1.33 (1.16, 1.53)  | <0.0001 |             |
| Q3             |             |                | 1.71 (1.49, 1.96)  | <0.0001 |             |
| Q4             |             |                | 2.06 (1.79, 2.37)  | <0.0001 |             |
| Q5             |             |                | 2.93 (2.54, 3.38)  | <0.0001 |             |
| <b>Model 3</b> |             |                |                    |         | <0.0001     |
| Q1             |             |                | Reference          |         |             |
| Q2             |             |                | 1.32 (1.15, 1.52)  | <0.0001 |             |
| Q3             |             |                | 1.68 (1.46, 1.93)  | <0.0001 |             |
| Q4             |             |                | 2.03 (1.76, 2.34)  | <0.0001 |             |
| Q5             |             |                | 2.76 (2.38, 3.21)  | <0.0001 |             |

\*Hyperuricemia is defined as serum uric acid above 5.6 mg/dL.

Model 1: unadjusted.

Model 2: adjusted for age, sex, BMI, ethnicity, education, smoking status, drinking habits, hypertension, hyperglycemia, TG, LDL-c, HDL-c and serum creatinine.

Model 3: adjusted for age, sex, BMI, ethnicity, education, smoking status, drinking habit, hypertension, hyperglycemia, TG, LDL-c, HDL-c, serum creatinine, daytime napping duration, therapy for hypertension or other cardiovascular diseases, ALT and AST.

Supplemental table 2. The prevalence of hyperuricemia\* and association of GGT level and hyperuricemia in the participants among different age groups or gender groups.

| GGT              | Prevalence  |                | OR (95% CI)                    | P       | P for trend |
|------------------|-------------|----------------|--------------------------------|---------|-------------|
| <b>Age</b>       |             |                |                                |         |             |
| <b>&lt; 45 y</b> |             |                |                                |         |             |
| Q1               | 107 (8.2)   | $X^2 = 720.8$  | Reference                      |         | <0.0001     |
| Q2               | 250 (19.6)  | $P < 0.0001$   | 1.50 (1.15, 1.96) <sup>1</sup> | 0.003   |             |
| Q3               | 244 (28.6)  |                | 1.74 (1.31, 3.31)              | <0.0001 |             |
| Q4               | 312 (243.0) |                | 2.35 (1.74, 3.12)              | <0.0001 |             |
| Q5               | 443 (57.8)  |                | 2.88 (2.08, 3.99)              | <0.0001 |             |
| <b>45-59 y</b>   |             |                |                                |         |             |
| Q1               | 183 (9.7)   | $X^2 = 1147.4$ | Reference                      |         | <0.0001     |
| Q2               | 385 (17.7)  | $P < 0.0001$   | 1.28 (1.04, 1.58)              | 0.02    |             |
| Q3               | 628 (28.4)  |                | 1.60 (1.30, 1.96)              | <0.0001 |             |
| Q5               | 903 (39.6)  |                | 2.11 (1.72, 2.60)              | <0.0001 |             |
| Q5               | 1195 (52.0) |                | 2.67 (2.14, 3.33)              | <0.0001 |             |
| <b>&gt; 59 y</b> |             |                |                                |         |             |
| Q1               | 122 (17.2)  | $X^2 = 417.2$  | Reference                      |         | <0.0001     |
| Q2               | 299 (23.6)  | $P < 0.0001$   | 1.13 (0.86, 1.48)              | 0.37    |             |
| Q3               | 514 (36.5)  |                | 1.66 (1.28, 2.16)              | <0.0001 |             |
| Q4               | 624 (42.5)  |                | 1.66 (1.28, 2.16)              | <0.0001 |             |
| Q5               | 765 (54.4)  |                | 2.57 (1.94, 3.39)              | <0.0001 |             |
| <b>Gender</b>    |             |                |                                |         |             |
| <b>Males</b>     |             |                |                                |         |             |
| Q1               | 128 (40.3)  | $X^2 = 368.6$  | Reference                      |         | <0.0001     |
| Q2               | 475 (46.8)  | $P < 0.0001$   | 1.21 (0.91, 1.59)              | 0.18    |             |
| Q3               | 818 (53.3)  |                | 1.35 (1.03, 1.76)              | 0.03    |             |
| Q4               | 1273 (63.8) |                | 1.83 (1.40, 2.39)              | 0.02    |             |
| Q5               | 1796 (75.5) |                | 2.83 (2.13, 3.74)              | <0.0001 |             |
| <b>Females</b>   |             |                |                                |         |             |
| Q1               | 284 (8.0)   | $X^2 = 451.2$  | Reference                      |         | <0.0001     |
| Q2               | 459 (12.4)  | $P < 0.0001$   | 1.29 (1.09, 1.53)              | 0.003   |             |
| Q3               | 568 (19.3)  |                | 1.81 (1.53, 2.14)              | <0.0001 |             |
| Q4               | 566 (22.8)  |                | 1.98 (1.66, 2.36)              | <0.0001 |             |
| Q5               | 607 (29.0)  |                | 2.41 (2.00, 2.90)              | <0.0001 |             |

\*Hyperuricemia is defined as serum uric acid above 5.6 mg/dL.

<sup>1</sup>Adjusted for age (as appropriate), sex (as appropriate), BMI, ethnicity, education, smoking status, drinking habit, hypertension, hyperglycemia, TG, LDL-c, HDL-c, serum creatinine, daytime napping duration, therapy for hypertension or other cardiovascular diseases, ALT and AST.

Supplemental table 3. The prevalence of hyperuricemia\* and association of GGT level and hyperuricemia in the participants among different ethnic groups.

| GGT                  | Prevalence  |                | OR (95% CI)                    | P       | P for trend |
|----------------------|-------------|----------------|--------------------------------|---------|-------------|
| <b>Ethnic group</b>  |             |                |                                |         |             |
| <b>Han ethnicity</b> |             |                |                                |         |             |
|                      |             |                |                                |         | <0.0001     |
| Q1                   | 240 (13.3)  | $X^2 = 1157.8$ | Reference                      |         |             |
| Q2                   | 551 (25.4)  | $P < 0.0001$   | 1.40 (1.16, 1.69) <sup>1</sup> | <0.0001 |             |
| Q3                   | 807 (37.7)  |                | 1.81 (1.50, 2.18)              | <0.0001 |             |
| Q4                   | 964 (48.8)  |                | 2.13 (1.75, 2.59)              | <0.0001 |             |
| Q5                   | 1200 (61.0) |                | 2.91 (2.37, 3.59)              | <0.0001 |             |
| <b>Yi ethnicity</b>  |             |                |                                |         |             |
|                      |             |                |                                |         | <0.0001     |
| Q1                   | 110 (10.9)  | $X^2 = 618.8$  | Reference                      |         |             |
| Q2                   | 201 (16.0)  | $P < 0.0001$   | 0.92 (0.70, 1.21)              | 0.54    |             |
| Q3                   | 294 (25.2)  |                | 1.14 (0.87, 1.50)              | 0.33    |             |
| Q5                   | 467 (37.8)  |                | 1.56 (1.19, 2.04)              | 0.001   |             |
| Q5                   | 672 (50.6)  |                | 2.15 (1.61, 2.86)              | <0.0001 |             |
| <b>Bai ethnicity</b> |             |                |                                |         |             |
|                      |             |                |                                |         | <0.0001     |
| Q1                   | 62 (5.8)    | $X^2 = 589.8$  | Reference                      |         |             |
| Q2                   | 182 (14.2)  | $P < 0.0001$   | 1.74 (1.23, 2.45)              | 0.002   |             |
| Q3                   | 285 (24.3)  |                | 2.04 (1.45, 2.87)              | <0.0001 |             |
| Q4                   | 408 (32.3)  |                | 2.25 (1.60, 3.16)              | <0.0001 |             |
| Q5                   | 531 (45.2)  |                | 2.74 (1.92, 3.91)              | <0.0001 |             |

\*Hyperuricemia was defined as serum uric acid above 5.6 mg/dL.

<sup>1</sup>Adjusted for age, sex, BMI, education, smoking status, drinking habit, hypertension, hyperglycemia, TG, LDL-c, HDL-c, serum creatinine, and daytime napping duration, therapy for hypertension or other cardiovascular diseases, ALT, AST.
